# Supplementary material
Source: PubMed Central journal article supplement (PMC8384946)
Supplement: NIHMS1672498-supplement-Supplementary_table_and_figure.pdf [file NIHMS1672498-supplement-Supplementary_table_and_figure.pdf]

Supplementary Figure 1. Sample inclusion process from the 2017 and 2019 Youth Risk Behavior Survey State-level surveys.

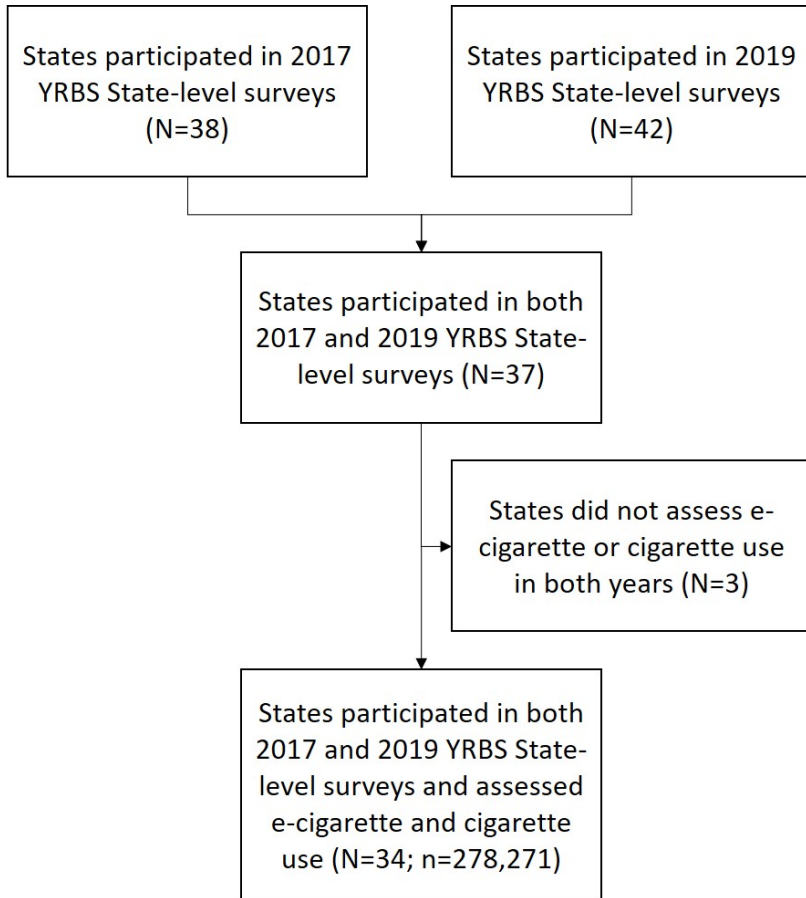

Supplementary Table 1. Implementation dates of state-level e-cigarette policies.

| Policy                                                  | State          | Implementation date |
|---------------------------------------------------------|----------------|---------------------|
| E-cigarette-inclusive smoke-free policy                 | Hawaii         | January 1, 2016     |
|                                                         | New York       | October 23, 2017    |
|                                                         | North Dakota   | December 6, 2012    |
|                                                         | Rhode Island   | July 1, 2018        |
|                                                         | Utah           | May 8, 2012         |
|                                                         | Vermont        | July 1, 2016        |
| Raising minimum age of sales of all tobacco to 21 years | Hawaii         | January 1, 2016     |
|                                                         | Maine          | July 1, 2018        |
| E-cigarette excise taxes                                | Kansas         | July 1, 2017        |
|                                                         | Louisiana      | August 1, 2015      |
|                                                         | North Carolina | June 1, 2015        |
|                                                         | Pennsylvania   | October 1, 2016     |
|                                                         | West Virginia  | July 1, 2016        |
